# Supplementary material for: Sports injuries and illnesses at the Lausanne 2020 Youth Olympic Winter Games: a prospective study of 1783 athletes from 79 countries
Source: HighWire-hosted journal article supplement (doi:10.1136/bjsports-2020-103514), 2021-03-03
Supplement: bjsports-2020-103514supp004_data_supplement.pdf [file bjsports-2020-103514supp004_data_supplement.pdf]

Online Appendix 4. Number of illnesses by affected system and cause, by sport.

| Sport              | All athletes            | Illness system |                   |                  |                                 |          | Illness cause |                  |           |                                     |           | All injuries           |
|--------------------|-------------------------|----------------|-------------------|------------------|---------------------------------|----------|---------------|------------------|-----------|-------------------------------------|-----------|------------------------|
|                    |                         | Dermatologic   | Gastro-intestinal | Musculo-skeletal | Respiratory (ear, nose, throat) | Other    | Environmental | Exercise-induced | Infection | Pre-existing (e.g. asthma, allergy) | Other     |                        |
| Ice Sports         |                         |                |                   |                  |                                 |          |               |                  |           |                                     |           |                        |
| Curling            | 96                      |                | 4                 |                  | 14                              | 1        | 7             |                  | 9         | 2                                   | 2         | 20                     |
| Ice Hockey         | 411                     |                | 7                 |                  | 16                              | 2        |               |                  |           |                                     |           | 25                     |
| 6-team             | 203                     |                | 6                 |                  | 8                               | 1        | 4             |                  | 8         |                                     | 3         | 15                     |
| 3 on 3 mixed       | 208                     |                | 1                 |                  | 8                               | 1        | 2             |                  | 5         | 1                                   | 2         | 10                     |
| Skating            |                         |                |                   |                  |                                 |          |               |                  |           |                                     |           |                        |
| Figure             | 71                      |                | 2                 |                  | 3                               | 2        | 4             |                  | 2         |                                     | 1         | 7                      |
| Short Track        | 62                      |                |                   |                  | 3                               |          | 1             |                  | 2         | 1                                   |           | 4                      |
| Speed              | 64                      |                | 1                 |                  | 4                               | 1        | 1             | 1                | 2         |                                     | 2         | 6                      |
| Ice Track          |                         |                |                   |                  |                                 |          |               |                  |           |                                     |           |                        |
| Bobsleigh          | 36                      |                | 2                 |                  | 2                               |          |               |                  | 2         |                                     | 2         | 4                      |
| Luge               | 85                      |                |                   |                  | 4                               |          |               |                  | 4         |                                     |           | 4                      |
| Skeleton           | 40                      |                |                   |                  | 1                               |          |               |                  | 1         |                                     |           | 1                      |
| Snow sports        |                         |                |                   |                  |                                 |          |               |                  |           |                                     |           |                        |
| Alpine Skiing      | 162                     | 2              | 3                 | 2                | 7                               | 1        | 3             | 1                | 5         |                                     | 6         | 15                     |
| Freestyle Skiing   |                         |                |                   |                  |                                 |          |               |                  |           |                                     |           |                        |
| Big air            | 53                      | 1              | 1                 |                  | 2                               |          | 1             |                  | 3         |                                     |           | 4                      |
| Cross              | 47                      |                | 1                 |                  |                                 |          | 1             |                  |           | 1                                   |           | 2                      |
| Halfpipe           | 35                      |                |                   |                  | 3                               |          | 2             |                  | 1         |                                     |           | 3                      |
| Slopestyle         | 52                      |                | 3                 |                  | 1                               |          |               |                  | 3         |                                     | 1         | 4                      |
| Snowboarding       |                         |                |                   |                  |                                 |          |               |                  |           |                                     |           |                        |
| Big air            | 52                      |                | 1                 |                  | 2                               |          |               |                  | 3         |                                     |           | 3                      |
| Cross              | 54                      |                |                   |                  | 3                               |          | 1             |                  | 2         |                                     |           | 3                      |
| Halfpipe           | 32                      |                | 2                 |                  | 2                               |          | 1             |                  | 2         |                                     | 1         | 4                      |
| Slopestyle         | 52                      |                | 1                 |                  | 4                               |          | 2             |                  | 3         |                                     |           | 5                      |
| Nordic skiing      |                         |                |                   |                  |                                 |          |               |                  |           |                                     |           |                        |
| Biathlon           | 204                     |                | 4                 | 1                | 9                               |          | 3             | 1                | 8         |                                     | 2         | 14                     |
| Cross-Country      | 165                     |                | 3                 |                  | 14                              |          | 2             | 1                | 12        |                                     | 2         | 17                     |
| Nordic Combined    | 57                      |                | 3                 |                  | 1                               |          |               |                  | 3         |                                     | 1         | 4                      |
| Ski Jumping        | 68                      |                |                   |                  | 1                               | 1        |               |                  | 1         |                                     |           | 2                      |
| Ski Mountaineering | 46                      |                |                   |                  | 5                               | 1        |               | 1                | 3         | 1                                   | 2         | 7                      |
| <b>Total</b>       | <b>1944<sup>a</sup></b> | <b>3</b>       | <b>40</b>         | <b>4</b>         | <b>107</b>                      | <b>9</b> | <b>37</b>     | <b>5</b>         | <b>88</b> | <b>6</b>                            | <b>30</b> | <b>167<sup>b</sup></b> |

<sup>a</sup>Data include 97 double and 32 triple starters. <sup>b</sup>9 illnesses sport unknown.
